# Supplementary material
Source: Elsevier journal article supplement (https://www.sciencedirect.com/science/article/pii/S217357942030205X)
Supplement: mmc1 [file S217357942030205X:mmc1.pdf]

## ANEXO:

### CUESTIONARIO CALIDAD DE VIDA: CUESTIONARIO DE INVESTIGACIÓN DE DESENLACES EN QUERATOCONO (KERATOCONUS OUTCOMES RESEARCH QUESTIONNAIRE - KORQ)

| <b>HABILIDAD VISUAL</b>                                                                                                                          |      |         |          |       |
|--------------------------------------------------------------------------------------------------------------------------------------------------|------|---------|----------|-------|
| Por favor seleccione la categoría que indica qué tanto considera que su visión le afecta su habilidad para realizar las actividades mencionadas. |      |         |          |       |
| <b>1. ¿Qué tanto interfiere su visión con el uso de las pantallas de ordenador (computador)?</b>                                                 |      |         |          |       |
| No aplica                                                                                                                                        | Nada | Un poco | Bastante | Mucho |
| <b>2. ¿Qué tanto interfiere su visión con la conducción durante el día?</b>                                                                      |      |         |          |       |
| No aplica                                                                                                                                        | Nada | Un poco | Bastante | Mucho |
| <b>3. ¿Qué tanto interfiere su visión con la conducción durante la noche?</b>                                                                    |      |         |          |       |
| No aplica                                                                                                                                        | Nada | Un poco | Bastante | Mucho |
| <b>4. ¿Qué tanto interfiere su visión con la lectura de los avisos en la calle?</b>                                                              |      |         |          |       |
| No aplica                                                                                                                                        | Nada | Un poco | Bastante | Mucho |
| <b>5. ¿Qué tanto interfiere su visión con el ver televisión?</b>                                                                                 |      |         |          |       |
| No aplica                                                                                                                                        | Nada | Un poco | Bastante | Mucho |
| <b>6. ¿Qué tanto interfiere su visión con el subir o bajar escaleras?</b>                                                                        |      |         |          |       |
| No aplica                                                                                                                                        | Nada | Un poco | Bastante | Mucho |
| <b>7. ¿Qué tanto interfiere su visión con evitar los objetos que están en su camino?</b>                                                         |      |         |          |       |
| No aplica                                                                                                                                        | Nada | Un poco | Bastante | Mucho |
| <b>8. ¿Qué tanto interfiere su visión con su capacidad para realizar su trabajo?</b>                                                             |      |         |          |       |
| No aplica                                                                                                                                        | Nada | Un poco | Bastante | Mucho |
| <b>9. ¿Qué tanto interfiere su visión con la capacidad para ver objetos lejanos?</b>                                                             |      |         |          |       |
| No aplica                                                                                                                                        | Nada | Un poco | Bastante | Mucho |
| <b>10. ¿Qué tanto interfieren las luces que se acercan con su habilidad para ver, y para realizar sus labores?</b>                               |      |         |          |       |
| No aplica                                                                                                                                        | Nada | Un poco | Bastante | Mucho |
| <b>11. ¿Qué tanto interfiere su visión con su capacidad de hacer tareas finas a distancia cercana?</b>                                           |      |         |          |       |
| No aplica                                                                                                                                        | Nada | Un poco | Bastante | Mucho |
| <b>12. ¿Qué tanto interfiere su visión con su capacidad para realizar sus pasatiempos?</b>                                                       |      |         |          |       |
| No aplica                                                                                                                                        | Nada | Un poco | Bastante | Mucho |
| <b>13. ¿Qué tanto interfiere su visión con su capacidad para reconocer rostros?</b>                                                              |      |         |          |       |
| No aplica                                                                                                                                        | Nada | Un poco | Bastante | Mucho |
| <b>14. ¿Qué tanto interfiere su visión con su capacidad para ver en condiciones de poca luz?</b>                                                 |      |         |          |       |
| No aplica                                                                                                                                        | Nada | Un poco | Bastante | Mucho |
| <b>15. ¿Qué tanto interfiere su visión con su capacidad para realizar las actividades del hogar (por limpiar, planchar, lavar, ducharse)?</b>    |      |         |          |       |

|                                                                                                                                                                                |      |         |          |       |
|--------------------------------------------------------------------------------------------------------------------------------------------------------------------------------|------|---------|----------|-------|
| No aplica                                                                                                                                                                      | Nada | Un poco | Bastante | Mucho |
| <b>16. ¿Qué tanto interfiere su visión con su capacidad para percibir la profundidad?</b>                                                                                      |      |         |          |       |
| No aplica                                                                                                                                                                      | Nada | Un poco | Bastante | Mucho |
| <b>17. ¿Qué tanto interfiere su visión con su capacidad para ver objetos pequeños a la distancia (por ejemplo pelotas de golf, dardos)?</b>                                    |      |         |          |       |
| No aplica                                                                                                                                                                      | Nada | Un poco | Bastante | Mucho |
| <b>18. ¿Qué tanto interfiere su visión en su capacidad para realizar tareas que requieren buena visión (por ejemplo tomar fotografías, usar un microscopio o binoculares)?</b> |      |         |          |       |
| No aplica                                                                                                                                                                      | Nada | Un poco | Bastante | Mucho |

| SÍNTOMAS                                                                                                         |      |         |          |       |
|------------------------------------------------------------------------------------------------------------------|------|---------|----------|-------|
| <b>1. ¿Qué tanto le molesta su visión distorsionada?</b>                                                         |      |         |          |       |
| No aplica                                                                                                        | Nada | Un poco | Bastante | Mucho |
| <b>2. ¿Qué tanto le molesta el deslumbramiento o el tener que usar anteojos de sol todo el tiempo?</b>           |      |         |          |       |
| No aplica                                                                                                        | Nada | Un poco | Bastante | Mucho |
| <b>3. ¿Qué tanto interfiere un día soleado e iluminado con su capacidad para ver y para realizar sus tareas?</b> |      |         |          |       |
| No aplica                                                                                                        | Nada | Un poco | Bastante | Mucho |
| <b>4. ¿Qué tanto le molesta el tener que usar lentes de contacto semi-rígidos o rígidos?</b>                     |      |         |          |       |
| No aplica                                                                                                        | Nada | Un poco | Bastante | Mucho |
| <b>5. ¿Qué tanto le molesta el tener dolores de cabeza cuando usa sus anteojos o lentes de contacto?</b>         |      |         |          |       |
| No aplica                                                                                                        | Nada | Un poco | Bastante | Mucho |
| <b>6. ¿Qué tanto le molesta tener ojos secos?</b>                                                                |      |         |          |       |
| No aplica                                                                                                        | Nada | Un poco | Bastante | Mucho |
| <b>7. Con respecto a sus ojos y su visión: ¿Qué tanto le molestan los días con mucho viento?</b>                 |      |         |          |       |
| No aplica                                                                                                        | Nada | Un poco | Bastante | Mucho |
| <b>8. Con respecto a sus ojos y su visión: ¿Qué tanto le molestan cuando está cansado?</b>                       |      |         |          |       |
| No aplica                                                                                                        | Nada | Un poco | Bastante | Mucho |
| <b>9. Con respecto a sus ojos y su visión: ¿Qué tanto le molestan los días secos?</b>                            |      |         |          |       |
| No aplica                                                                                                        | Nada | Un poco | Bastante | Mucho |
| <b>10. Con respecto a sus ojos y su visión: ¿Qué tanto le molestan los días con mucho polvo?</b>                 |      |         |          |       |
| No aplica                                                                                                        | Nada | Un poco | Bastante | Mucho |
| <b>11. Con respecto a sus ojos y su visión: ¿Qué tanto le molestan los ambientes con humo?</b>                   |      |         |          |       |
| No aplica                                                                                                        | Nada | Un poco | Bastante | Mucho |
